# Supplementary material for: Excess BAFF May Impact HIV-1-Specific Antibodies and May Promote Polyclonal Responses Including Those from First-Line Marginal Zone B-Cell Populations
Source: MDPI journal article supplement (doi:10.3390/cimb46010003), 2023-12-19

## Supplementary Figures

### Figure Legends

#### **Supplementary Figure S1. Marginal zone (MZ) and precursor-like (MZp) B-cell populations bind to fully glycosylated gp120 and this is increased by BAFF.**

Flow cytometry analyses of negatively enriched total B-cells from the blood of an HIV-uninfected donor (**A-B**). Dot plots showing proportion of live gated blood CD19<sup>+</sup> B-cells binding to fully glycosylated gp120 (top panels), and following pre-incubation of cells with mannose at 5 mg/ml for 40 minutes (bottom panels) (**A**). Gp120 binding B-cells were majorly IgM<sup>+</sup> and comprised CD27<sup>+</sup>CD1c<sup>+</sup>CD21<sup>+</sup> innate marginal zone (MZ) B-cells. Representative dot plots showing a negligible proportion of CD19<sup>+</sup> B-cells binding to partially glycosylated gp120 ( $\Delta$ V1-V2-V3) (**B**). Negatively enriched total B-cells from the tonsils of an HIV-uninfected donor (**C-E**). Dot plots showing proportion of live gated tonsillar CD19<sup>+</sup> B-cells binding to fully glycosylated gp120 following culture with medium alone (MA) or BAFF at 125 ng/mL for 18 hours (**A**). Frequencies of MZ (**B**) or MZp (**C**) binding to fully glycosylated gp120 following culture with MA or BAFF at 125 ng/ml.

#### **Supplementary Figure S2. C-type lectins gene transcripts expressed by blood marginal zone (MZ) and precursor-like MZ (MZp) B-cells.**

RNAseq analyses of marginal zone (MZ) and precursor-like MZ (MZp) B-cells sorted from the blood of HIV-1-uninfected controls (HIV-), 5-8 months HIV-1-infected classic progressors (HIV+) and elite controllers (EC), demonstrating gene expression levels of CLEC2A (**A**), DCIR (**B**), CLEC16A (**C**),  $\alpha$ 4 (**D**),  $\beta$ 7 (**E**), DEC205 (**F**). N=3 for each study group. \*P < 0,05; \*\* P< 0,01; \*\*\* P< 0,001; \*\*\*\*P< 0,0001. The Wald Test with Benjamini-Hochberg correction was used for RNAseq analysis.

#### **Supplementary Figure S3. Effect of adding gp120 on Ig production by total tonsillar B-cells.**

Multiplex analyses of concentrations of total IgM (**A-E**), IgG1 (**B-F**), IgG3 (**C-G**) and IgA (**D-H**) measured in day 7 supernatants of total tonsillar B-cells cultured either with medium alone (MA), TLR7 agonist or gp120 Bal or IIIB, with or without BAFF at 125 ng/ml. Data are presented for donors LFB-019 (**A- D**) n=2 and D013 (**E- H**) n=2.

Supplementary Figure S1

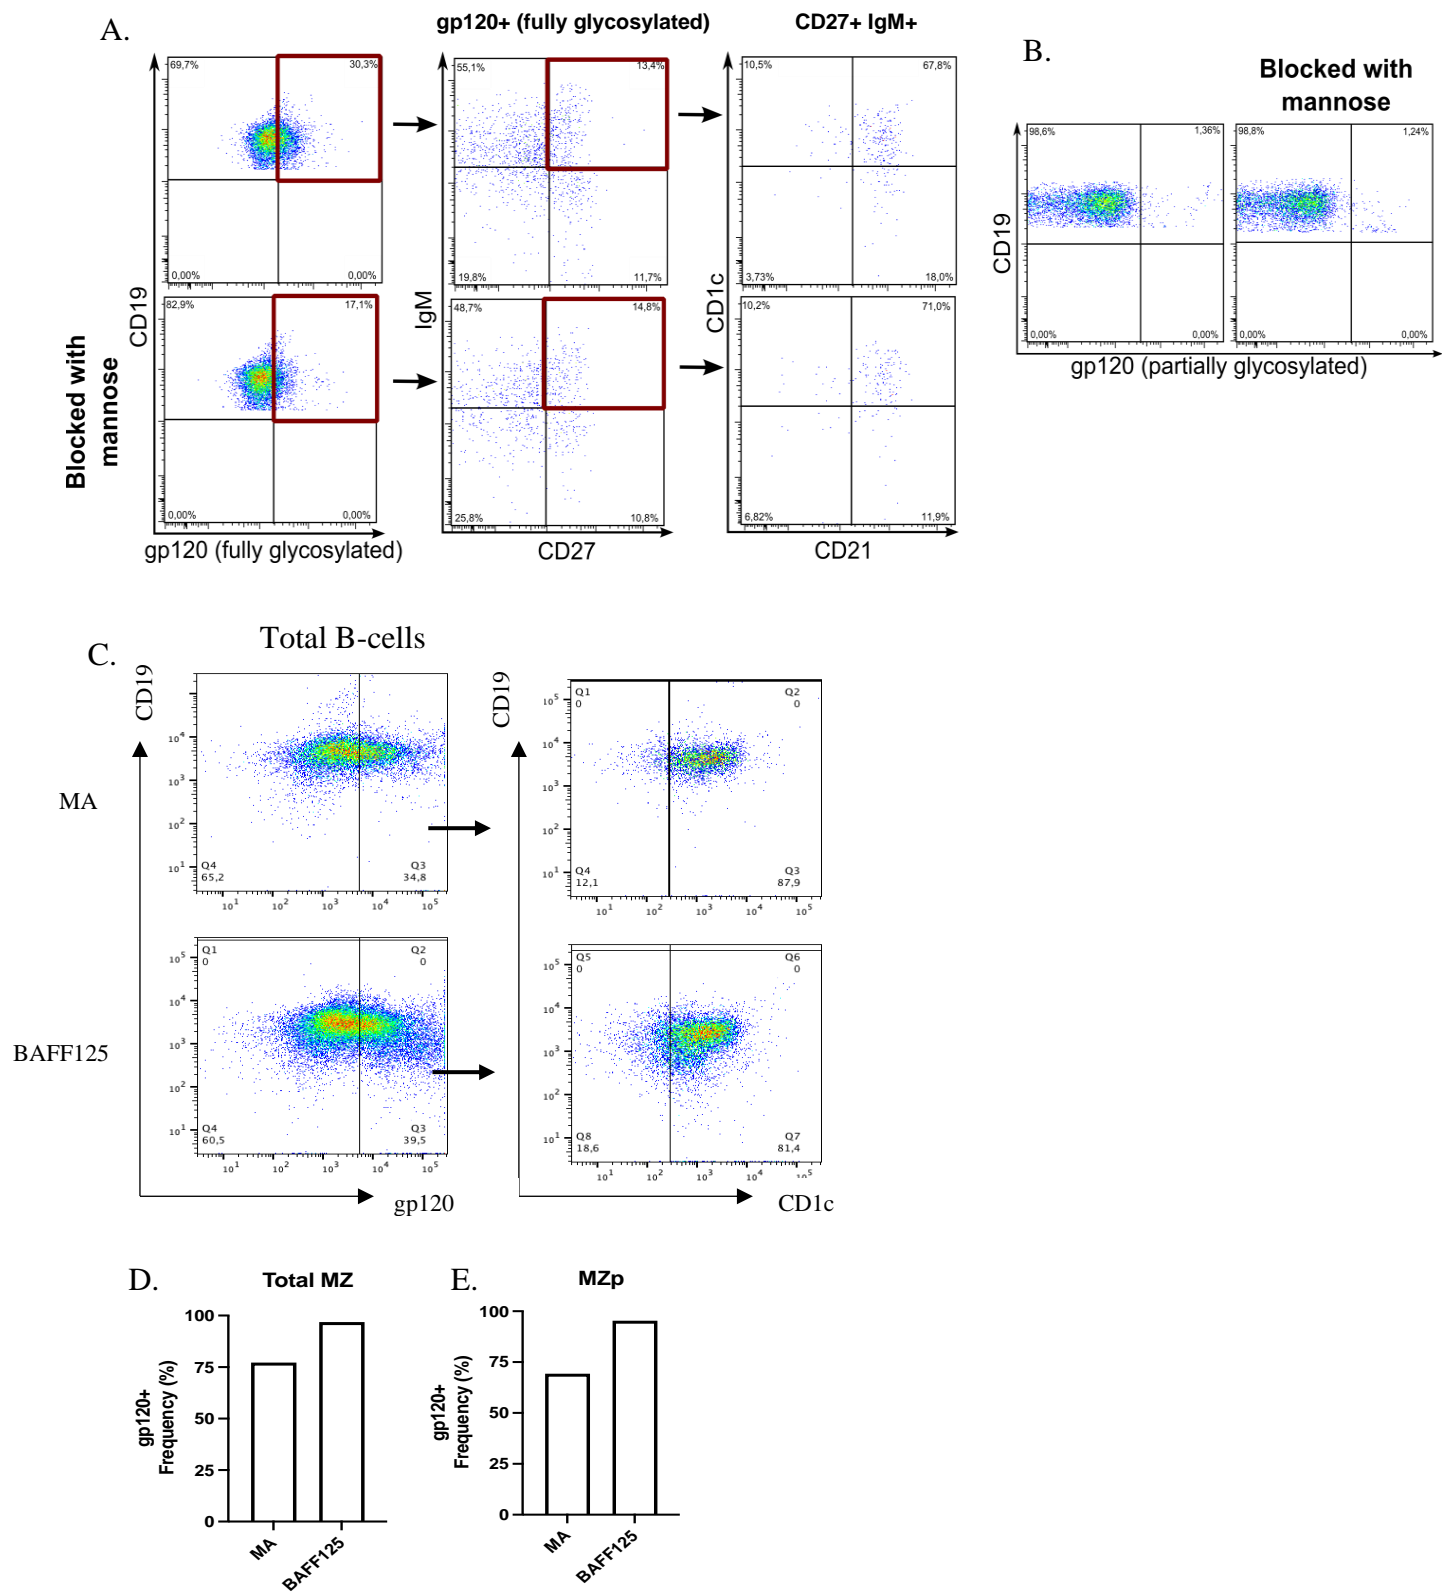

Supplementary Figure S2

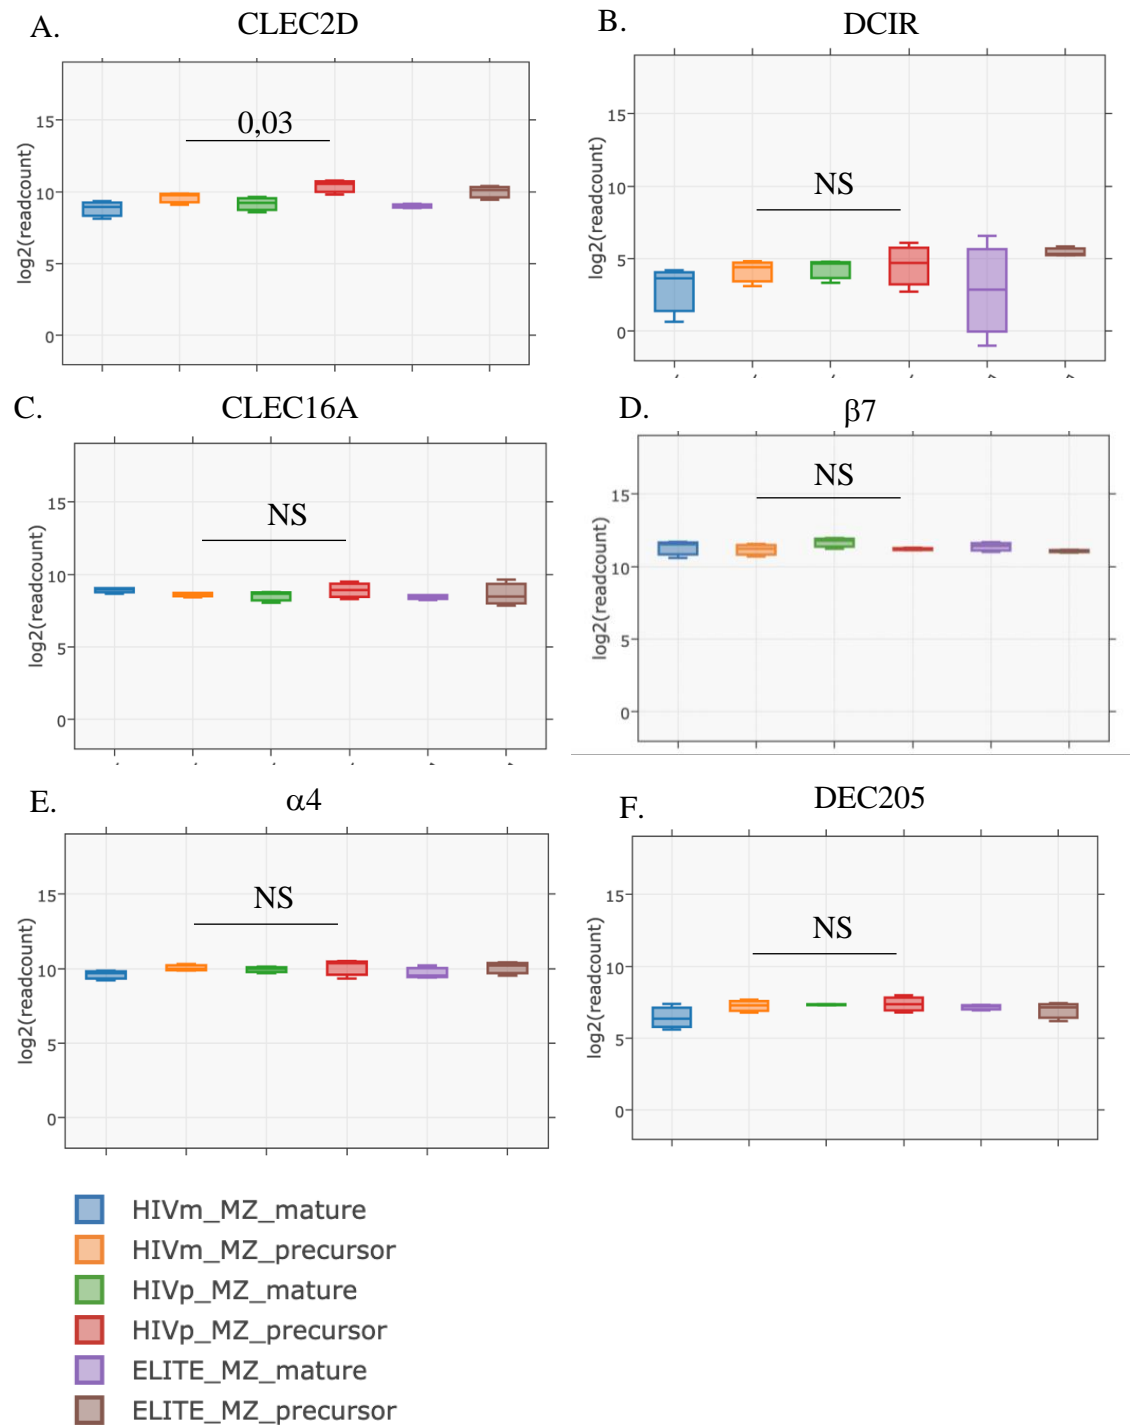

Supplementary Figure S3

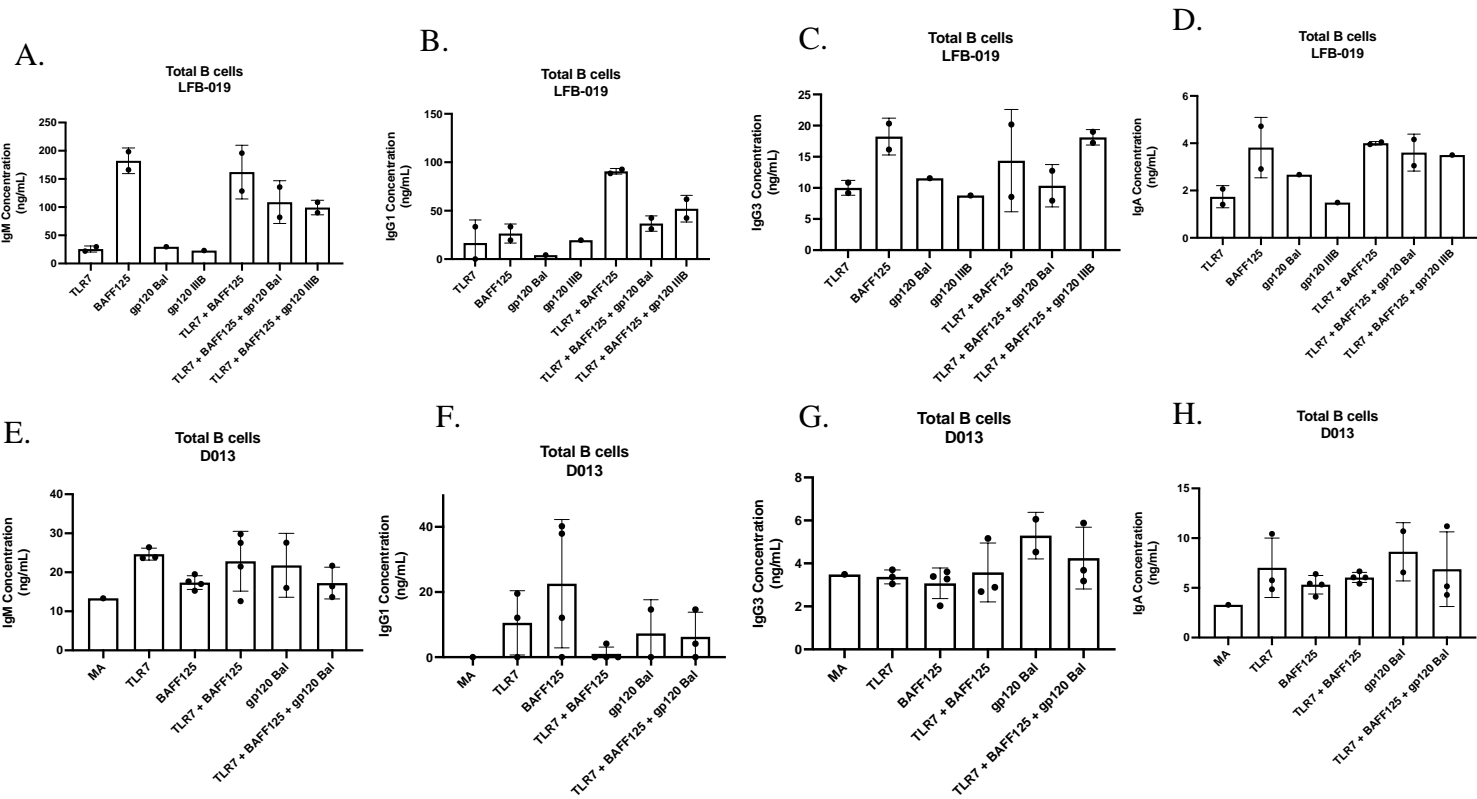

Supplement: s1 [file s1]
